# Supplementary material for: The Challenges of Genome-Wide Interaction Studies: Lessons to Learn from the Analysis of HDL Blood Levels
Source: PLoS One. 2014 Oct 20;9(10):e109290. doi: 10.1371/journal.pone.0109290 (PMC4203717; doi:10.1371/journal.pone.0109290)
Supplement: Table S1 — The 181 interaction terms with a p-value<1 · 10−8 after meta-analysis in RS-I, RS-II and RS-III. (XLS) [file pone.0109290.s001.xls]

## Sheet:  
Supplementary table 1: The 181 interaction terms with a p-value < 1x10-8 after meta-analysis in RS-I, RS-II and RS-III. The MAF values are based on RS-I.
SNP1					SNP2					RS-I			RS-II			RS-III			Meta-analysis of RS-I, RS-II, RS-III
name	chr	pos	gene	MAF	name	chr	pos	gene	MAF	ßint	SE	p-value	ßint	SE	p-value	ßint	SE	p-value	ßint	SE	p-value
rs935798	21	43605784	-	0.0613	rs1984282	13	35045665	NBEA	0.0583	0.961	0.1565	9.38e-10	0.3589	0.2646	0.175127	0.6126	0.2038	0.00269	0.746	0.1124	3.09e-11
rs4786149	16	7382250	A2BP1	0.4588	rs8129130	21	21372551	NCAM2	0.1907	0.264	0.0469	2.02e-08	0.2382	0.0652	0.00027	0.1068	0.0627	0.089	0.215	0.0326	3.85e-11
rs935798	21	43605784	-	0.0613	rs1327966	13	35067579	NBEA	0.0582	0.945	0.1554	1.34e-09	0.3594	0.2645	0.174392	0.6126	0.2038	0.00269	0.74	0.112	3.9e-11
rs935798	21	43605784	-	0.0613	rs17769531	13	35127300	NBEA	0.0582	0.956	0.1565	1.13e-09	0.3011	0.2583	0.243926	0.6101	0.2035	0.00276	0.729	0.1118	7.16e-11
rs2144699	6	52609877	-	0.1638	rs10508362	10	8714527	-	0.1463	-0.416	0.0721	8.39e-09	-0.171	0.103	0.09694	-0.3013	0.0955	0.00164	-0.326	0.0502	8.3e-11
rs4786149	16	7382250	A2BP1	0.4588	rs8128145	21	21370692	NCAM2	0.1919	0.261	0.0469	2.87e-08	0.2135	0.0643	0.000913	0.1074	0.0628	0.0873	0.208	0.0324	1.46e-10
rs3756856	6	35218683	-	0.1448	rs7762721	6	107973191	SOBP	0.4089	-0.323	0.0517	5.16e-10	-0.1637	0.0678	0.015957	-0.1112	0.0684	0.104	-0.224	0.0353	2.3e-10
rs633797	10	6012371	FBXO18	0.3969	rs7734329	5	179417444	RNF130	0.2544	0.221	0.0414	1.03e-07	0.1417	0.056	0.011418	0.1537	0.0583	0.0085	0.183	0.0289	2.31e-10
rs610093	10	6002641	FBXO18	0.3971	rs7734329	5	179417444	RNF130	0.2544	0.22	0.0414	1.14e-07	0.1408	0.0559	0.011901	0.1533	0.058	0.00831	0.183	0.0289	2.61e-10
rs2186674	11	76031656	-	0.4221	rs12540556	7	12680041	-	0.053	0.526	0.0822	1.88e-10	0.2958	0.1246	0.017731	0.1449	0.1034	0.161	0.361	0.0572	2.79e-10
rs4861849	4	181496371	-	0.054	rs17123865	12	48352314	FMNL3	0.0859	0.84	0.1457	8.99e-09	0.6146	0.2282	0.00715	0.3517	0.1848	0.0573	0.645	0.1023	2.84e-10
rs754950	9	37483114	POLR1E	0.3274	rs4658547	1	241457754	CEP170	0.1367	0.324	0.0584	3.08e-08	0.1614	0.0827	0.051011	0.2157	0.0761	0.00466	0.255	0.0404	2.95e-10
rs7931131	11	76030556	-	0.4223	rs12540556	7	12680041	-	0.053	0.527	0.0822	1.75e-10	0.2917	0.1246	0.019387	0.1443	0.1034	0.163	0.36	0.0572	2.99e-10
rs6571907	14	38752236	-	0.086	rs10025951	4	91643255	MGC48628	0.0699	0.68	0.1248	5.64e-08	0.5133	0.1716	0.00283	0.3445	0.1896	0.0694	0.561	0.0891	3.13e-10
rs454999	2	7080330	RNF144A	0.407	rs7560642	2	39855536	THUMPD2	0.4835	-0.204	0.0374	5.7e-08	-0.0426	0.0512	0.405798	-0.2068	0.0508	4.88e-05	-0.163	0.026	3.4e-10
rs3808149	7	126245015	GRM8	0.1491	rs7587361	2	23389640	-	0.3464	0.263	0.052	4.59e-07	0.2215	0.0724	0.002247	0.1771	0.0766	0.021	0.232	0.037	3.51e-10
rs931202	8	3443246	CSMD1	0.0996	rs2798317	9	114438885	KIAA1958	0.1795	0.394	0.0784	5.26e-07	0.2764	0.1092	0.011462	0.3595	0.1238	0.00375	0.355	0.0566	3.56e-10
rs668498	10	5998078	FBXO18	0.4003	rs7734329	5	179417444	RNF130	0.2544	0.215	0.0415	2.48e-07	0.1376	0.0559	0.01392	0.1622	0.0579	0.00514	0.181	0.0289	3.66e-10
rs2798123	1	48816485	-	0.3625	rs12199673	6	73937687	KCNQ5	0.0991	-0.324	0.0633	3.46e-07	-0.1976	0.0892	0.026868	-0.2691	0.0868	0.00196	-0.278	0.0444	3.68e-10
rs4786150	16	7382294	A2BP1	0.4754	rs8129130	21	21372551	NCAM2	0.1907	0.238	0.0465	3.33e-07	0.2412	0.0646	0.000194	0.1017	0.0626	0.105	0.202	0.0323	3.76e-10
rs6689636	1	47698609	-	0.0762	rs8048621	16	17257678	XYLT1	0.105	0.611	0.1145	1.04e-07	0.6038	0.1597	0.000163	0.2038	0.1442	0.158	0.489	0.0782	3.91e-10
rs7897207	10	117925692	GFRA1	0.1445	rs10441723	9	34072144	-	0.3186	0.337	0.0579	6.7e-09	0.2193	0.0763	0.004107	0.1164	0.0757	0.124	0.246	0.0394	4.38e-10
rs1052656	9	34077360	WDR40A	0.3187	rs7897207	10	117925692	GFRA1	0.1445	0.333	0.0579	9.36e-09	0.2219	0.0766	0.003805	0.1164	0.0757	0.124	0.245	0.0394	5.15e-10
rs4148822	7	86915932	ABCB4	0.0659	rs17771308	16	76042377	-	0.0845	0.744	0.1475	4.85e-07	0.6886	0.1815	0.000153	0.2963	0.1752	0.091	0.595	0.0958	5.47e-10
rs855498	9	33603835	-	0.1809	rs944248	20	59741646	CDH4	0.3375	-0.278	0.0505	4.18e-08	-0.1059	0.068	0.119581	-0.2154	0.0686	0.00171	-0.216	0.0349	5.73e-10
rs10816852	9	111471779	PALM2	0.077	rs10911905	1	184919018	-	0.1235	0.604	0.1	1.77e-09	0.1067	0.1514	0.480947	0.4211	0.142	0.00306	0.445	0.0719	6.43e-10
rs10816852	9	111471779	PALM2	0.077	rs12401885	1	184949498	-	0.1244	0.584	0.1	5.82e-09	0.111	0.1534	0.469155	0.4416	0.1387	0.00148	0.442	0.0717	6.77e-10
rs11753215	6	75313286	-	0.0762	rs17587240	12	32216222	BICD1	0.0657	0.664	0.1303	3.74e-07	0.5461	0.1708	0.001416	0.3484	0.1772	0.0495	0.551	0.0894	7.17e-10
rs2143417	1	184920410	-	0.1452	rs10816852	9	111471779	PALM2	0.077	0.54	0.0943	1.11e-08	0.1561	0.1452	0.282612	0.4008	0.1348	0.00298	0.42	0.0682	7.51e-10
rs4786150	16	7382294	A2BP1	0.4754	rs8128145	21	21370692	NCAM2	0.1919	0.236	0.0464	4.01e-07	0.2246	0.0636	0.000426	0.1023	0.0627	0.103	0.198	0.0322	8e-10
rs2320	10	5970518	to be discussed	0.3962	rs7734329	5	179417444	RNF130	0.2544	0.213	0.0412	2.56e-07	0.1282	0.056	0.022134	0.1554	0.0579	0.00732	0.176	0.0288	9.22e-10
rs7475361	10	13413722	SEPHS1	0.4045	rs13258732	8	104179751	-	0.1187	-0.308	0.0586	1.52e-07	-0.26	0.0808	0.001314	-0.1277	0.0729	0.0801	-0.243	0.0398	1e-09
rs7863451	9	129112065	GARNL3	0.3581	rs17238193	4	93461766	GRID2	0.0774	-0.39	0.071	4.33e-08	-0.1493	0.0952	0.117165	-0.2756	0.0929	0.00306	-0.296	0.0486	1.05e-09
rs754970	11	45008403	-	0.3804	rs2306478	4	104222597	BDH2	0.1832	0.26	0.0487	1.07e-07	0.1473	0.0651	0.023774	0.1552	0.0614	0.0115	0.201	0.0329	1.06e-09
rs1740191	21	18843067	-	0.2422	rs2918006	2	231492535	GPR55	0.135	-0.331	0.0621	1.04e-07	-0.2518	0.0859	0.003434	-0.1528	0.0911	0.0936	-0.269	0.0441	1.08e-09
rs600222	6	148262708	-	0.4493	rs6812708	4	15150707	CC2D2A	0.2606	-0.25	0.0413	1.53e-09	-0.1432	0.0585	0.01456	-0.07	0.0554	0.206	-0.176	0.0288	1.13e-09
rs740422	22	15999292	CECR5	0.2298	rs9811760	3	32796370	LOC389101	0.1616	0.306	0.058	1.4e-07	0.2467	0.0758	0.001165	0.1194	0.0771	0.122	0.241	0.0396	1.13e-09
rs1565326	2	28410584	BRE	0.0745	rs9999371	4	63803081	-	0.087	0.675	0.1287	1.69e-07	0.4313	0.16	0.007101	0.38	0.178	0.0329	0.531	0.0874	1.21e-09
rs564733	6	100225170	-	0.1833	rs918702	16	48026635	-	0.2719	0.266	0.0517	2.89e-07	0.2277	0.0723	0.00167	0.1266	0.0736	0.0856	0.222	0.0365	1.23e-09
rs900654	6	151712590	AKAP12	0.2245	rs10195135	2	204689162	-	0.1869	-0.296	0.0555	1.05e-07	-0.1147	0.0769	0.135814	-0.2492	0.0793	0.0017	-0.238	0.0391	1.28e-09
rs831429	12	102585961	STAB2	0.2694	rs1939041	11	101173235	-	0.4321	0.218	0.0409	1.01e-07	0.1318	0.0556	0.017873	0.1324	0.0599	0.0272	0.175	0.0289	1.33e-09
rs2234044	6	35198075	TCP11	0.1425	rs7762721	6	107973191	SOBP	0.4089	-0.309	0.0527	5.1e-09	-0.1635	0.068	0.016319	-0.111	0.0685	0.105	-0.216	0.0356	1.38e-09
rs2281645	9	35799328	to be discussed	0.305	rs10040138	5	117399363	-	0.098	-0.365	0.0671	5.58e-08	-0.2212	0.0946	0.019506	-0.1938	0.0921	0.0354	-0.285	0.047	1.39e-09
rs769566	3	110677949	FLJ25363	0.3849	rs7020269	9	27810493	-	0.4992	-0.219	0.0382	1.05e-08	-0.0728	0.0509	0.152732	-0.1339	0.0499	0.0073	-0.158	0.0261	1.46e-09
rs2242312	11	129780556	ADAMTS8	0.0602	rs11190870	10	102969197	-	0.4316	0.439	0.0789	3e-08	0.2196	0.1111	0.048299	0.2437	0.1067	0.0225	0.333	0.0551	1.55e-09
rs2316640	13	54542925	-	0.1926	rs10973877	9	3852693	GLIS3	0.4764	0.232	0.0459	4.32e-07	0.1337	0.0676	0.048136	0.1839	0.0638	0.00399	0.197	0.0326	1.64e-09
rs3756856	6	35218683	-	0.1448	rs6940398	6	107992696	SOBP	0.4031	-0.312	0.0523	2.67e-09	-0.134	0.0669	0.045461	-0.1255	0.0689	0.0686	-0.213	0.0354	1.64e-09
rs2802523	13	39923396	-	0.3382	rs2916182	5	33293060	-	0.1742	0.291	0.0502	7.72e-09	0.1083	0.0706	0.125124	0.1642	0.0702	0.0194	0.213	0.0354	1.71e-09
rs2545281	4	181888059	-	0.1786	rs10194181	2	22824059	-	0.3015	-0.269	0.0526	3.43e-07	-0.125	0.0716	0.081097	-0.2236	0.072	0.00192	-0.22	0.0365	1.78e-09
rs756474	8	95704126	-	0.262	rs6925036	6	139671831	-	0.1036	0.337	0.0669	5.12e-07	0.2605	0.0945	0.005931	0.2005	0.0917	0.029	0.282	0.0469	1.79e-09
rs6848132	4	93460610	GRID2	0.0774	rs7863451	9	129112065	GARNL3	0.3581	-0.384	0.0713	7.95e-08	-0.147	0.0952	0.122723	-0.2756	0.0929	0.00306	-0.292	0.0486	1.83e-09
rs2798125	1	48812971	-	0.3711	rs12199673	6	73937687	KCNQ5	0.0991	-0.32	0.0629	3.81e-07	-0.1707	0.0896	0.056932	-0.2532	0.0869	0.00363	-0.266	0.0443	1.85e-09
rs2281645	9	35799328	to be discussed	0.305	rs9327068	5	117459594	-	0.0903	-0.355	0.0681	2.02e-07	-0.2251	0.0998	0.024216	-0.2248	0.0949	0.018	-0.291	0.0484	1.94e-09
rs1078545	17	68279579	SLC39A11	0.0555	rs4663525	2	235518053	-	0.0856	0.645	0.1257	3.1e-07	0.6398	0.1893	0.000745	0.2387	0.2062	0.247	0.56	0.0934	1.97e-09
rs1473935	12	41827516	-	0.2617	rs1475067	14	33086522	NPAS3	0.4085	-0.215	0.0422	3.8e-07	-0.1276	0.0577	0.027279	-0.1517	0.0576	0.00857	-0.176	0.0293	1.98e-09
rs4631843	11	102020406	-	0.3115	rs11716163	3	31782580	OSBPL10	0.2904	0.251	0.043	6.22e-09	0.1481	0.0609	0.01511	0.0802	0.0613	0.191	0.183	0.0305	2e-09
rs273136	7	41470145	-	0.2415	rs7580582	2	223919607	-	0.161	0.296	0.0567	1.85e-07	0.0542	0.0761	0.476564	0.2965	0.0752	8.37e-05	0.233	0.0389	2.09e-09
rs2472537	8	133929827	PHF20L1	0.2227	rs4959388	6	6527122	-	0.315	0.25	0.0456	4.66e-08	0.1675	0.0639	0.008818	0.104	0.0652	0.111	0.193	0.0322	2.12e-09
rs546526	1	5993457	-	0.4408	rs1723430	7	147151607	CNT-P2	0.3848	0.197	0.0383	2.97e-07	0.1023	0.0522	0.050273	0.1451	0.052	0.00535	0.159	0.0266	2.2e-09
rs3762096	10	98126240	TLL2	0.3654	rs6434859	2	197000628	HECW2	0.2516	-0.243	0.0436	2.6e-08	-0.0465	0.0587	0.428854	-0.1959	0.0582	0.000774	-0.179	0.03	2.2e-09
rs931007	2	6517628	-	0.4555	rs11956168	5	76740007	PDE8B	0.074	-0.364	0.0704	2.48e-07	-0.1161	0.0878	0.186123	-0.3232	0.0917	0.000438	-0.282	0.0471	2.21e-09
rs1426588	11	12387302	PARVA	0.1543	rs10277450	7	70001719	-	0.4329	0.272	0.05	5.79e-08	0.1029	0.0696	0.139119	0.19	0.0673	0.0048	0.208	0.0347	2.22e-09
rs17051183	4	132535899	-	0.2485	rs17759080	8	2129518	-	0.1075	-0.424	0.0676	4.01e-10	-0.0281	0.0928	0.761847	-0.2698	0.0945	0.00437	-0.283	0.0473	2.32e-09
rs2872373	3	78189818	-	0.3452	rs9926562	16	24202820	CACNG3	0.1462	0.312	0.0555	2.04e-08	0.1653	0.077	0.031889	0.1432	0.0744	0.0545	0.23	0.0385	2.33e-09
rs6812708	4	15150707	CC2D2A	0.2606	rs9403895	6	148313066	-	0.4511	-0.239	0.0411	6.58e-09	-0.1505	0.0578	0.009311	-0.0665	0.0557	0.233	-0.171	0.0287	2.33e-09
rs3006898	1	53855900	GLIS1	0.2085	rs6709696	2	10374017	HPCAL1	0.1105	0.384	0.0723	1.13e-07	0.275	0.0959	0.004187	0.1588	0.1029	0.123	0.3	0.0503	2.46e-09
rs1450490	15	94296130	-	0.1214	rs2873680	8	139903147	COL22A1	0.3705	-0.305	0.0587	2.16e-07	-0.1977	0.0756	0.009055	-0.166	0.0823	0.0439	-0.241	0.0404	2.47e-09
rs4822830	22	25703720	-	0.072	rs17089382	18	70369681	CNDP1	0.1141	0.554	0.1066	2.14e-07	0.1856	0.1523	0.223144	0.476	0.1439	0.000958	0.445	0.0746	2.59e-09
rs1052994	9	5884344	MLA-	0.2591	rs9671842	14	20659016	-	0.2982	0.236	0.0463	3.73e-07	0.1821	0.0627	0.0037	0.1153	0.0614	0.0606	0.19	0.0318	2.63e-09
rs3773786	3	161093605	SCHIP1	0.264	rs12823621	12	32646526	FGD4	0.1023	-0.358	0.0663	6.86e-08	-0.2642	0.0918	0.004058	-0.1271	0.0989	0.199	-0.281	0.0472	2.73e-09
rs3819409	6	135567089	MYB	0.391	rs17075783	4	185562486	IRF2	0.0944	0.375	0.063	2.91e-09	0.1704	0.0937	0.06914	0.1418	0.0895	0.113	0.268	0.0451	2.8e-09
rs2016584	18	50636771	-	0.2574	rs11142952	9	73468300	-	0.1683	0.293	0.056	1.68e-07	0.1544	0.0715	0.030957	0.1859	0.0767	0.0155	0.227	0.0382	2.81e-09
rs10895338	11	102023403	-	0.3125	rs11716163	3	31782580	OSBPL10	0.2904	0.248	0.0431	8.86e-09	0.149	0.0609	0.014513	0.0778	0.0612	0.204	0.181	0.0305	2.82e-09
rs2760262	3	132047847	-	0.2095	rs7207041	17	8936271	NTN1	0.1045	-0.411	0.0743	3.38e-08	-0.2833	0.1049	0.006963	-0.1434	0.1008	0.155	-0.309	0.052	2.82e-09
rs3006496	10	30599420	-	0.2671	rs17729021	20	58495497	-	0.2404	0.251	0.0484	2.4e-07	0.163	0.0656	0.013116	0.1418	0.0668	0.0339	0.2	0.0337	2.82e-09
rs273140	7	41472639	-	0.2422	rs7580582	2	223919607	-	0.161	0.293	0.0567	2.49e-07	0.0525	0.0761	0.490048	0.296	0.0751	8.49e-05	0.231	0.0389	2.85e-09
rs1413202	1	240938655	-	0.3017	rs6899567	6	157595	-	0.0598	0.42	0.0829	4.29e-07	0.2563	0.1169	0.028458	0.2779	0.1087	0.0106	0.341	0.0574	2.9e-09
rs1030044	2	70807253	ADD2	0.3753	rs16929855	10	29514883	-	0.1722	-0.247	0.0486	4.07e-07	-0.2944	0.0707	3.3e-05	-0.0436	0.0661	0.51	-0.203	0.0342	2.9e-09
rs163118	12	112656547	-	0.0535	rs1545933	1	72384303	NEGR1	0.1632	0.557	0.1005	3.29e-08	0.2679	0.156	0.086082	0.3155	0.1421	0.0266	0.431	0.0726	2.9e-09
rs754950	9	37483114	POLR1E	0.3274	rs10926977	1	241477990	CEP170	0.1439	0.292	0.057	3.09e-07	0.1824	0.0804	0.023358	0.18	0.0752	0.0167	0.235	0.0395	2.92e-09
rs7863451	9	129112065	GARNL3	0.3581	rs13122471	4	93537827	GRID2	0.0793	-0.362	0.0691	1.72e-07	-0.1054	0.0965	0.274994	-0.2954	0.088	0.000802	-0.281	0.0473	2.96e-09
rs1426588	11	12387302	PARVA	0.1543	rs10248926	7	69995265	-	0.4332	0.269	0.05	8.28e-08	0.101	0.0696	0.147072	0.1912	0.0673	0.00456	0.206	0.0348	3.04e-09
rs2281645	9	35799328	to be discussed	0.305	rs6895560	5	117435433	-	0.098	-0.355	0.067	1.23e-07	-0.2203	0.0947	0.020165	-0.1896	0.0921	0.0396	-0.279	0.047	3.08e-09
rs3107803	10	14773471	FAM107B	0.3817	rs4785229	16	49430496	-	0.255	-0.229	0.0419	5.1e-08	-0.1071	0.0594	0.071565	-0.1386	0.0602	0.0214	-0.176	0.0298	3.18e-09
rs2838677	21	45014195	UBE2G2	0.1381	rs11055393	12	13423255	-	0.0771	0.493	0.0947	2.11e-07	0.2997	0.1416	0.034423	0.3176	0.1384	0.0219	0.405	0.0684	3.3e-09
rs1833284	18	50654587	RAB27B	0.2908	rs11142952	9	73468300	-	0.1683	0.3	0.0538	2.64e-08	0.1626	0.0694	0.019265	0.1263	0.075	0.0924	0.219	0.037	3.34e-09
rs1111693	13	39925503	-	0.3373	rs2916182	5	33293060	-	0.1742	0.287	0.0503	1.29e-08	0.1061	0.0708	0.134319	0.1598	0.0702	0.023	0.209	0.0354	3.38e-09
rs754970	11	45008403	-	0.3804	rs3775972	4	104223811	BDH2	0.1845	0.25	0.0487	2.93e-07	0.143	0.0645	0.026885	0.1514	0.0614	0.0139	0.194	0.0328	3.38e-09
rs898560	8	106221494	-	0.1954	rs7837228	8	51948282	-	0.2009	0.293	0.0585	5.79e-07	0.1875	0.0826	0.023389	0.1969	0.0789	0.0127	0.241	0.0409	3.39e-09
rs172677	12	13988737	GRIN2B	0.3825	rs1812958	3	179610518	-	0.1594	-0.265	0.0496	9.78e-08	-0.1889	0.0716	0.008394	-0.1132	0.0685	0.0989	-0.207	0.035	3.4e-09
rs645925	1	230562925	-	0.4706	rs12231356	12	70695815	TPH2	0.0688	0.445	0.0719	6.8e-10	0.24	0.0968	0.013283	0.0719	0.0953	0.45	0.292	0.0494	3.49e-09
rs752923	3	138274927	-	0.0565	rs17146362	7	22190692	RAPGEF5	0.1225	0.655	0.1246	1.58e-07	0.2477	0.1772	0.16232	0.5295	0.1781	0.00299	0.522	0.0884	3.49e-09
rs2301818	4	7057299	TBC1D14	0.1384	rs7537266	1	236457778	-	0.2432	-0.294	0.0588	6.15e-07	-0.1145	0.0843	0.174848	-0.2852	0.0847	0.000775	-0.247	0.0419	3.56e-09
rs4299518	3	45784277	SLC6A20	0.4694	rs13333201	16	13136820	LOC729993	0.0738	0.406	0.072	1.79e-08	0.2674	0.1041	0.010282	0.131	0.0909	0.15	0.293	0.0496	3.57e-09
rs4721885	7	20150946	7A5	0.298	rs12713521	2	64670760	AFTPH	0.2933	-0.232	0.0439	1.26e-07	-0.1504	0.0568	0.008132	-0.1036	0.0609	0.0892	-0.178	0.0302	3.82e-09
rs652260	19	7806562	EVI5L	0.4576	rs7242691	18	67389435	-	0.067	-0.37	0.0715	2.41e-07	-0.1499	0.098	0.126551	-0.3305	0.1105	0.00282	-0.302	0.0512	3.84e-09
rs10146997	14	79014915	NRXN3	0.2069	rs10205184	2	160782918	-	0.3176	-0.243	0.0482	4.91e-07	-0.1679	0.0663	0.011404	-0.1404	0.0646	0.0299	-0.197	0.0334	3.89e-09
rs2146043	9	5267261	-	0.1541	rs11124513	2	36472171	CRIM1	0.2937	0.272	0.0537	4.42e-07	0.2541	0.0758	0.000824	0.0966	0.0742	0.193	0.222	0.0377	3.95e-09
rs1557318	18	22316209	KCTD1	0.2083	rs7233164	18	8582726	-	0.2784	-0.245	0.0471	2.07e-07	-0.0997	0.0707	0.159069	-0.2046	0.0704	0.0037	-0.201	0.0343	4.07e-09
rs257973	5	118834319	HSD17B4	0.4635	rs10482957	21	25220861	-	0.0996	0.321	0.0577	2.96e-08	0.3145	0.0833	0.000166	0.0159	0.0798	0.843	0.24	0.0408	4.16e-09
rs10785182	12	73950922	LOC100130268	0.2052	rs12674264	7	88389392	ZNF804B	0.093	0.437	0.0827	1.36e-07	0.2669	0.1024	0.009266	0.202	0.1144	0.0777	0.329	0.0561	4.23e-09
rs10816852	9	111471779	PALM2	0.077	rs10911901	1	184890629	-	0.1406	0.541	0.0951	1.4e-08	0.1272	0.1465	0.385366	0.3631	0.1363	0.00778	0.404	0.0688	4.28e-09
rs25640	5	118839432	HSD17B4	0.4637	rs10482957	21	25220861	-	0.0996	0.319	0.0578	3.53e-08	0.3176	0.0837	0.000153	0.017	0.08	0.831	0.24	0.0409	4.3e-09
rs7116312	11	19035868	MRGPRX2	0.2665	rs7124129	11	83229104	DLG2	0.1283	0.311	0.0609	3.33e-07	0.151	0.0872	0.083372	0.2277	0.0824	0.00578	0.25	0.0427	4.42e-09
rs454999	2	7080330	RNF144A	0.407	rs2540228	2	39808136	-	0.4668	-0.2	0.0374	9.84e-08	-0.0422	0.0501	0.39942	-0.1746	0.0509	0.000619	-0.151	0.0258	4.54e-09
rs652260	19	7806562	EVI5L	0.4576	rs1539910	18	67398870	-	0.0657	-0.365	0.0723	4.88e-07	-0.1747	0.0965	0.070295	-0.3189	0.1116	0.00433	-0.301	0.0514	4.59e-09
rs1475566	1	62352025	I-DL	0.2644	rs1950489	14	98248060	C14orf177	0.0614	0.449	0.0849	1.32e-07	0.2798	0.1236	0.023733	0.227	0.1117	0.0422	0.347	0.0593	4.65e-09
rs4424332	9	77690125	-	0.4124	rs17569783	5	171252534	FBXW11	0.0594	-0.379	0.0778	1.16e-06	-0.3786	0.105	0.000321	-0.1345	0.0992	0.175	-0.31	0.0529	4.9e-09
rs5018943	8	130422775	-	0.4678	rs7023148	9	10674803	-	0.0965	-0.307	0.0595	2.6e-07	-0.2764	0.0896	0.002076	-0.1116	0.0837	0.183	-0.249	0.0427	4.99e-09
rs10195135	2	204689162	-	0.1869	rs10872670	6	151711568	AKAP12	0.2252	-0.299	0.0555	7.87e-08	-0.0916	0.0767	0.232311	-0.2279	0.0779	0.00347	-0.228	0.0389	5.01e-09
rs7542810	1	184798854	-	0.1158	rs10816852	9	111471779	PALM2	0.077	0.586	0.1017	9.31e-09	0.1243	0.1582	0.432103	0.3708	0.1439	0.0101	0.43	0.0736	5.04e-09
rs1373051	9	3370518	RFX3	0.1241	rs2291256	12	131903396	GOLGA3	0.0897	0.494	0.0945	1.89e-07	0.1341	0.141	0.341867	0.4295	0.1324	0.0012	0.394	0.0675	5.18e-09
rs4959388	6	6527122	-	0.315	rs7839989	8	133865448	PHF20L1	0.2227	0.246	0.0456	6.98e-08	0.1551	0.0637	0.015093	0.104	0.0652	0.111	0.188	0.0322	5.19e-09
rs831429	12	102585961	STAB2	0.2694	rs4754814	11	101247816	-	0.4335	0.216	0.0409	1.46e-07	0.121	0.0556	0.029817	0.1227	0.0597	0.0401	0.168	0.0289	5.27e-09
rs1152944	12	68684239	-	0.1273	rs11595633	10	12518482	CAMK1D	0.2086	0.336	0.0658	3.47e-07	0.1781	0.0932	0.056092	0.2264	0.0884	0.0106	0.268	0.0459	5.33e-09
rs1859201	16	24228442	CACNG3	0.3432	rs10869083	9	73834282	-	0.4077	0.202	0.0396	3.64e-07	0.1266	0.0538	0.018856	0.1148	0.0529	0.0302	0.159	0.0273	5.54e-09
rs6472235	8	66984584	-	0.3611	rs10771279	12	26421810	ITPR2	0.4238	-0.189	0.037	3.21e-07	-0.1109	0.054	0.040285	-0.1213	0.0522	0.0202	-0.153	0.0263	5.78e-09
rs7231944	18	22317693	KCTD1	0.1656	rs7233164	18	8582726	-	0.2784	-0.264	0.0516	3.46e-07	-0.0603	0.0794	0.448047	-0.2672	0.0761	0.00046	-0.219	0.0376	5.97e-09
rs1819887	18	50654311	RAB27B	0.2898	rs11142952	9	73468300	-	0.1683	0.294	0.0538	4.92e-08	0.1558	0.0695	0.025173	0.1307	0.075	0.0817	0.215	0.037	6.1e-09
rs7214582	17	67471558	-	0.058	rs17075071	5	172045679	LOC54492	0.0954	0.708	0.1409	5.37e-07	0.2911	0.1787	0.10354	0.5382	0.1769	0.00238	0.545	0.0938	6.13e-09
rs996702	21	18845882	-	0.2334	rs2918006	2	231492535	GPR55	0.135	-0.333	0.0628	1.27e-07	-0.2232	0.0883	0.011605	-0.1439	0.092	0.118	-0.26	0.0447	6.17e-09
rs1905707	4	94516595	GRID2	0.0573	rs4729644	7	100456577	MUC17	0.1128	0.734	0.1287	1.28e-08	0.2229	0.1636	0.173419	0.3981	0.1633	0.0149	0.5	0.086	6.18e-09
rs1170994	13	35479177	DCLK1	0.1736	rs4484286	4	23920609	-	0.1332	-0.421	0.0692	1.35e-09	-0.1247	0.1009	0.216854	-0.1697	0.0968	0.0797	-0.286	0.0492	6.19e-09
rs774801	3	139413035	ARMC8	0.4568	rs12442098	15	95385874	-	0.092	-0.317	0.0607	1.9e-07	-0.1473	0.0913	0.10677	-0.2483	0.0988	0.012	-0.261	0.045	6.2e-09
rs2370982	14	78960430	NRXN3	0.203	rs10205184	2	160782918	-	0.3176	-0.249	0.0487	3.6e-07	-0.1467	0.0659	0.026058	-0.1462	0.0649	0.0243	-0.195	0.0335	6.29e-09
rs1905707	4	94516595	GRID2	0.0573	rs13239478	7	100453272	MUC17	0.1148	0.732	0.1261	7.14e-09	0.2203	0.1607	0.170436	0.3666	0.1613	0.0231	0.49	0.0845	6.57e-09
rs225717	6	142589792	-	0.238	rs1421804	5	97461287	-	0.416	-0.239	0.0442	6.48e-08	-0.0681	0.062	0.272294	-0.171	0.0599	0.00438	-0.179	0.0308	6.67e-09
rs820065	6	35148398	ANKS1A	0.1446	rs7762721	6	107973191	SOBP	0.4089	-0.3	0.0518	7.72e-09	-0.1517	0.0685	0.026904	-0.0922	0.0684	0.178	-0.205	0.0354	6.89e-09
rs7306272	12	128653849	TMEM132D	0.0578	rs12329441	20	23698897	-	0.2165	0.54	0.0969	2.72e-08	0.2434	0.1429	0.088787	0.2638	0.133	0.0476	0.398	0.0687	6.92e-09
rs695002	4	114237413	ANK2	0.3881	rs13003126	2	211420173	-	0.11	-0.303	0.0589	3.02e-07	-0.2167	0.085	0.01087	-0.1444	0.0789	0.0674	-0.239	0.0413	6.96e-09
rs7118900	11	112772031	ANKK1	0.184	rs11694445	2	29887783	ALK	0.2456	0.303	0.0557	5.95e-08	0.1391	0.0753	0.064817	0.1659	0.0791	0.0362	0.226	0.039	7.02e-09
rs454999	2	7080330	RNF144A	0.407	rs6722610	2	39839246	THUMPD2	0.4561	-0.194	0.0377	2.9e-07	-0.0547	0.0505	0.27868	-0.1672	0.0505	0.000957	-0.15	0.0259	7.04e-09
rs3756856	6	35218683	-	0.1448	rs11758333	6	107952171	SOBP	0.3994	-0.308	0.0522	4.03e-09	-0.1502	0.0679	0.027059	-0.0834	0.0686	0.224	-0.205	0.0354	7.05e-09
rs1375933	15	31088800	FMN1	0.124	rs4962232	9	139512315	PNPLA7	0.467	0.271	0.054	5.42e-07	0.1912	0.0815	0.019052	0.1599	0.076	0.0356	0.224	0.0387	7.09e-09
rs6672638	1	184684107	PDC	0.1168	rs10816852	9	111471779	PALM2	0.077	0.581	0.1012	1.03e-08	0.0903	0.1534	0.556178	0.3911	0.144	0.00669	0.422	0.0729	7.1e-09
rs2107280	7	8590239	NXPH1	0.2356	rs6602012	10	3061763	-	0.1341	0.307	0.06	3.26e-07	0.1002	0.0829	0.226811	0.2589	0.0821	0.00164	0.242	0.0418	7.24e-09
rs2315598	2	132994224	GPR39	0.446	rs2853228	8	103296258	RRM2B	0.0709	0.399	0.0757	1.47e-07	0.2537	0.1015	0.012568	0.1721	0.0995	0.0839	0.3	0.0518	7.37e-09
rs2217903	13	101098018	ITGBL1	0.1616	rs3935649	10	113114800	-	0.474	-0.264	0.0486	6e-08	-0.1233	0.068	0.070094	-0.1407	0.0669	0.0356	-0.197	0.0341	7.4e-09
rs2829734	21	25707900	-	0.2661	rs9596744	13	52463504	-	0.0923	0.35	0.0693	4.6e-07	0.2503	0.1043	0.016473	0.1926	0.0957	0.0444	0.286	0.0494	7.4e-09
rs2919732	11	70610592	-	0.3738	rs12759209	1	211933317	-	0.1354	-0.313	0.0573	4.96e-08	-0.1584	0.0735	0.031234	-0.1395	0.0767	0.0691	-0.225	0.0389	7.44e-09
rs2026886	21	45655301	COL18A1	0.3868	rs7341922	9	118788380	ASTN2	0.226	0.229	0.0449	3.85e-07	0.1866	0.0619	0.002609	0.0861	0.06	0.151	0.18	0.0311	7.49e-09
rs5770418	22	48198080	-	0.1482	rs17234336	7	1186531	-	0.0562	0.552	0.1072	2.76e-07	0.1878	0.145	0.195422	0.4611	0.1511	0.00232	0.433	0.0749	7.55e-09
rs4963291	11	61756261	-	0.4144	rs6929274	6	158491489	SERAC1	0.2838	0.231	0.0405	1.29e-08	0.2161	0.056	0.000117	-0.0136	0.0547	0.803	0.163	0.0281	7.64e-09
rs487903	4	1871707	WHSC1	0.179	rs816504	3	39588996	-	0.165	-0.311	0.0592	1.57e-07	-0.2937	0.092	0.001442	-0.0826	0.0817	0.312	-0.246	0.0425	7.69e-09
rs2411137	17	73151219	-	0.4866	rs7816996	8	4744017	CSMD1	0.2661	-0.208	0.04	2.29e-07	-0.0597	0.0548	0.275872	-0.1807	0.0567	0.00147	-0.162	0.0281	7.72e-09
rs1203791	4	2392071	-	0.1656	rs10496556	2	119603876	-	0.409	0.268	0.0502	1.03e-07	0.1486	0.068	0.029124	0.13	0.0699	0.0631	0.202	0.035	7.89e-09
rs10816852	9	111471779	PALM2	0.077	rs12062743	1	184714214	-	0.1171	0.584	0.1012	8.72e-09	0.0847	0.1535	0.581177	0.3844	0.1439	0.00765	0.42	0.0728	7.98e-09
rs1569879	1	184814575	-	0.1167	rs10816852	9	111471779	PALM2	0.077	0.593	0.1017	6.21e-09	0.0903	0.1535	0.556568	0.3695	0.144	0.0104	0.421	0.0731	7.99e-09
rs1488003	7	135424885	-	0.1397	rs11620649	14	74956723	-	0.1181	0.437	0.0778	2.19e-08	0.1432	0.1269	0.259273	0.2533	0.1136	0.0259	0.33	0.0573	8.2e-09
rs806454	6	88860318	-	0.2338	rs17578868	13	100079576	TMTC4	0.1565	0.309	0.0608	3.88e-07	0.2292	0.0899	0.010918	0.148	0.0791	0.0615	0.245	0.0425	8.26e-09
rs6812090	4	127535820	-	0.1304	rs7830440	8	68979537	-	0.1142	0.45	0.0824	4.97e-08	0.2908	0.1196	0.015123	0.1582	0.1116	0.156	0.334	0.058	8.3e-09
rs2280518	3	71401683	FOXP1	0.0626	rs9875407	3	110115185	GUCA1C	0.2207	0.516	0.0935	3.59e-08	0.2262	0.1265	0.07409	0.2604	0.1317	0.0482	0.376	0.0653	8.34e-09
rs6442460	3	14551071	GRIP2	0.082	rs10914332	1	31471589	-	0.1645	0.468	0.0821	1.35e-08	0.071	0.126	0.573038	0.3063	0.1121	0.00636	0.338	0.0586	8.52e-09
rs871849	8	847080	C8orf68	0.1348	rs9672547	15	95301314	-	0.471	-0.28	0.0556	5.13e-07	-0.2166	0.0746	0.003743	-0.1163	0.0712	0.103	-0.218	0.0378	8.59e-09
rs4729644	7	100456577	MUC17	0.1128	rs11937272	4	94524964	GRID2	0.0565	0.737	0.1294	1.36e-08	0.2099	0.1629	0.197671	0.398	0.1634	0.015	0.496	0.0861	8.69e-09
rs13333201	16	13136820	LOC729993	0.0738	rs17279465	3	45789752	SLC6A20	0.4296	0.366	0.0689	1.2e-07	0.2656	0.1058	0.012139	0.1428	0.0889	0.108	0.279	0.0484	8.72e-09
rs4376902	11	21302552	NELL1	0.0722	rs10871180	13	83884074	-	0.4753	-0.345	0.0678	3.95e-07	-0.201	0.1001	0.044912	-0.2182	0.0957	0.0228	-0.279	0.0484	8.72e-09
rs10816852	9	111471779	PALM2	0.077	rs12405141	1	184890093	-	0.1183	0.591	0.1014	6.18e-09	0.0724	0.1529	0.63612	0.3806	0.1439	0.00827	0.419	0.0729	8.74e-09
rs273129	7	41461365	-	0.2198	rs7580582	2	223919607	-	0.161	0.292	0.0584	6.16e-07	0.063	0.0772	0.414863	0.2934	0.0787	0.000198	0.231	0.0401	8.74e-09
rs2669858	3	132148221	ATP2C1	0.2118	rs7207041	17	8936271	NTN1	0.1045	-0.401	0.0729	4.21e-08	-0.244	0.1022	0.017104	-0.1398	0.1001	0.163	-0.294	0.0511	8.75e-09
rs30453	19	44537384	SAMD4B	0.0975	rs17150832	7	77930180	MAGI2	0.1368	0.479	0.0946	4.35e-07	0.3796	0.121	0.00173	0.1671	0.1065	0.117	0.351	0.0611	8.82e-09
rs10494757	1	195774034	-	0.0615	rs11520658	7	63140064	-	0.0675	0.769	0.1476	2.04e-07	0.476	0.2558	0.062975	0.4639	0.2243	0.0388	0.639	0.1111	8.89e-09
rs3752031	17	7260866	NLGN2	0.3115	rs11008055	10	19336756	-	0.3755	-0.219	0.0413	1.14e-07	-0.0846	0.0555	0.127492	-0.142	0.0557	0.0109	-0.164	0.0285	8.92e-09
rs10150482	14	78961635	NRXN3	0.2075	rs10205184	2	160782918	-	0.3176	-0.249	0.0483	2.68e-07	-0.1436	0.0658	0.029249	-0.1358	0.0646	0.0359	-0.192	0.0334	8.95e-09
rs11937272	4	94524964	GRID2	0.0565	rs13239478	7	100453272	MUC17	0.1148	0.734	0.1267	7.56e-09	0.209	0.16	0.191826	0.3664	0.1614	0.0234	0.486	0.0846	8.99e-09
rs6744445	2	29880469	ALK	0.2411	rs7118900	11	112772031	ANKK1	0.184	0.305	0.0558	4.94e-08	0.1386	0.0753	0.066014	0.1558	0.0789	0.0483	0.224	0.039	8.99e-09
rs547923	1	4368744	-	0.2464	rs4612814	11	120100023	GRIK4	0.145	0.312	0.0603	2.36e-07	0.0728	0.0788	0.355806	0.27	0.0798	0.000738	0.236	0.0411	9e-09
rs6136143	20	17520757	DSTN	0.3539	rs12676762	8	80728593	STMN2	0.142	0.3	0.0533	1.84e-08	0.1576	0.0738	0.032844	0.1053	0.0746	0.158	0.215	0.0374	9.05e-09
rs4394833	11	44738207	-	0.3647	rs6897719	5	34831738	RAI14	0.1757	0.268	0.0503	1.01e-07	0.13	0.0653	0.046549	0.1391	0.0663	0.036	0.196	0.0341	9.13e-09
rs2472537	8	133929827	PHF20L1	0.2227	rs3804464	6	6536282	LY86	0.3904	0.214	0.0429	6.81e-07	0.2087	0.0618	0.000747	0.065	0.0614	0.29	0.176	0.0306	9.25e-09
rs6426013	1	37464036	-	0.0773	rs7565730	2	75407540	-	0.1494	0.501	0.0959	1.84e-07	0.3976	0.133	0.002832	0.1432	0.1446	0.322	0.393	0.0685	9.27e-09
rs2685174	3	132147789	ATP2C1	0.2118	rs7207041	17	8936271	NTN1	0.1045	-0.4	0.0729	4.49e-08	-0.2437	0.1022	0.017244	-0.1398	0.1001	0.163	-0.293	0.0511	9.27e-09
rs4596126	3	13634898	FBLN2	0.2386	rs11676467	2	7750712	-	0.1207	0.429	0.0691	6.22e-10	-0.0247	0.0897	0.783173	0.297	0.0914	0.00118	0.27	0.047	9.3e-09
rs139668	22	23575118	SGSM1	0.3095	rs4656250	1	158219883	-	0.145	-0.292	0.0581	5.14e-07	-0.1781	0.0733	0.015254	-0.1633	0.0808	0.0435	-0.228	0.0397	9.35e-09
rs7631734	3	139453597	ARMC8	0.4592	rs12442098	15	95385874	-	0.092	-0.316	0.0606	1.9e-07	-0.136	0.092	0.139837	-0.248	0.0994	0.0127	-0.259	0.0451	9.39e-09
rs2013041	14	22299387	-	0.1563	rs10511302	3	113170446	PHLDB2	0.4113	0.28	0.0507	3.76e-08	0.0943	0.0685	0.168978	0.1733	0.0732	0.018	0.204	0.0356	9.44e-09
rs671919	1	75536079	SLC44A5	0.2832	rs17738513	8	436359	C8orf42	0.064	-0.436	0.0809	7.59e-08	-0.33	0.1111	0.003025	-0.1037	0.1117	0.353	-0.324	0.0564	9.59e-09
rs6921588	6	167414387	-	0.412	rs10736301	10	85421384	LOC728050	0.2184	0.217	0.0429	4.76e-07	0.1248	0.0618	0.043616	0.1397	0.0608	0.0216	0.175	0.0305	9.72e-09
rs1773356	1	209920952	-	0.2217	rs4631763	1	200395900	PTPN7	0.065	-0.443	0.0882	5.24e-07	-0.4239	0.1256	0.000754	-0.131	0.1151	0.255	-0.351	0.0611	9.76e-09
rs225717	6	142589792	-	0.238	rs1421807	5	97460301	-	0.414	-0.238	0.044	6.81e-08	-0.0626	0.0624	0.316313	-0.1684	0.0599	0.00503	-0.177	0.0308	9.89e-09
rs693	2	21085700	APOB	0.499	rs4677039	3	71839455	EIF4E3	0.3222	0.195	0.0387	4.69e-07	0.0451	0.0547	0.409866	0.1904	0.0544	0.000483	0.157	0.0273	9.89e-09
